# Supplementary material for: Genome-Wide Identification of Somatic Aberrations from Paired Normal-Tumor Samples
Source: PLoS One. 2014 Jan 30;9(1):e87212. doi: 10.1371/journal.pone.0087212 (PMC3907544; doi:10.1371/journal.pone.0087212)
Supplement: File S1 — contains the following files. Text S1. Detailed description of statistical methods in GIANT. Figure S1. Comparison of BAF signals in two normal replicates on different chromosomes. Figure S2. Visualized genomic aberrations for replicate pairs. Figure S3. Comparison of estimated normal cell contamination levels and tumor average copy number for simulated tumor SNP arrays. Figure S4. Comparison of specificity for identifying normal regions in simulated tumor samples. Figure S5 Sensitivities for distinguishing aberrations from normal regions by five different methods. Figure S6. Theoretical and real mean values of LRR/BAF in different scenarios. Figure S7. Aberrations in chromosome 6 of breast cancer cell line CRL-2324. Figure S8. Aberrations in chromosome 13 of breast cancer cell line CRL-2324. Figure S9. Comparison of results for breast cancer cell line CRL-2324 by different methods. Figure S10. Comparison of self-consistency for GIANT and GPHMM using dilution series data. Figure S11. Visualized results of GIANT for replicate breast cancer sample. Figure S12. Detection of germline homozygous deletion of ADAM3A gene in diluted breast tumor sample 7207. Figure S13. Comparison of the results for chromosome 8 of breast tumor 7207 by different methods. Figure S14. Significance test of genome-wide somatic amplification and LOH for urothelial cancer samples. Figure S15. Significance test of genome-wide somatic deletion for urothelial cancer samples. Figure S16. Box plots of summarized results for 112 breast cancer samples. Figure S17. Distinct patterns of genome-wide copy number profiles identified in two groups of tumors. Figure S18. Genome-wide CNA profiles of breast cancer samples. Figure S19. Frequency plot of genomic-wide CNA for 112 breast cancer samples. Figure S20. Frequency plot of genomic-wide LOH for 112 breast cancer samples. Table S1. Detailed information of hidden states in PSHMM. Table S2. Parameters estimated by GIANT on replicate SNP arrays. Table S [file pone.0087212.s001.zip › TableS4.xlsx]

## Sheet: Sheet1
Chromosome	Start position	End position	CRL2324		CRL2325		100% tumor		79% tumor		50% tumor		47% tumor		45% tumor		34% tumor		30% tumor		23% tumor		21% tumor		14% tumor		10% tumor
			Type	Copy number	Type	Copy number	LRR mean	BAF Mean	LRR mean	BAF Mean	LRR mean	BAF Mean	LRR mean	BAF Mean	LRR mean	BAF Mean	LRR mean	BAF Mean	LRR mean	BAF Mean	LRR mean	BAF Mean	LRR mean	BAF Mean	LRR mean	BAF Mean	LRR mean	BAF Mean
1	16654349	17158797	Amplification	3	Normal	2	-0.00733816	0.9979	0.0219614	0.887442	0.0309021	0.764623	0.0148557	0.766056	-0.00672629	0.753831	-0.0309947	0.705689	0.0128825	0.652877	0.020144	0.686321	0.0147869	0.64493	-0.00830684	0.542467	0.0251756	0.540377
1	23386567	23752795	Amplification	3	Normal	2	0.0841543	0.996912	0.0771137	0.93588	0.105173	0.767971	0.114053	0.769069	0.0643172	0.663002	0.149824	0.703147	0.0678439	0.676317	0.0778828	0.701974	0.0792723	0.552239	0.090671	0.579511	0.0475057	0.544249
1	167352845	167967684	Amplification	3	Normal	2	0.0378566	0.998578	0.0457085	0.911265	0.00133088	0.80232	0.00994427	0.771561	0.0208759	0.698396	0.025148	0.593392	0.0161459	0.593691	0.0105863	0.594017	-0.00103602	0.568057	0.0141983	0.585753	0.00834142	0.584128
1	75864754	76298371	Deletion	1	Normal	2	-0.99916	0.993405	-0.682861	0.852948	-0.410222	0.668472	-0.424126	0.673618	-0.318678	0.747222	-0.281	0.613202	-0.236089	0.610585	-0.302622	0.627	-0.187001	0.571333	-0.118081	0.56848	-0.120447	0.57202
3	164046708	164764164	Deletion	1	Normal	2	-0.881503	0.988393	-0.668158	0.828197	-0.369327	0.616923	-0.387732	0.613872	-0.252055	0.822576	-0.242703	0.821035	-0.205105	0.814349	-0.227107	0.827637	-0.164181	0.821579	-0.0670599	0.513667	-0.0857592	0.516721
4	171848346	173132711	Normal	2	Normal	2	-0.369293	0.979713	-0.302095	0.957032	-0.227898	0.944672	-0.23366	0.949147	-0.170829	0.940994	-0.160883	0.93777	-0.159122	0.934412	-0.169644	0.937914	-0.126977	0.922339	-0.116647	0.911671	-0.112103	0.902527
7	10833212	11300952	Normal	2	Normal	2	-0.285523	0.992218	-0.216268	0.967774	-0.133618	0.923671	-0.158809	0.923719	-0.103117	0.906761	-0.115851	0.903233	-0.0849919	0.901313	-0.104908	0.903219	-0.0677998	0.883271	-0.0389403	0.872276	-0.0212259	0.869897
11	80657571	80870945	Normal	2	Normal	2	-0.258838	0.998531	-0.202448	0.862759	-0.106588	0.849555	-0.123823	0.850494	-0.0693067	0.844261	-0.0802845	0.844151	-0.0442573	0.842467	-0.0570099	0.845838	-0.0127182	0.837966	0.0159214	0.838689	-0.00816129	0.836428
16	57482633	58065639	Amplification	3	Deletion	1	0.00311637	0.686122	-0.0229668	0.708619	-0.24628	0.779171	-0.188381	0.732049	-0.196485	0.788123	-0.254886	0.894516	-0.258591	0.830879	-0.255729	0.801861	-0.286287	0.933083	-0.413798	0.892724	-0.516062	0.910894
16	58652880	58838489	Amplification	3	Deletion	1	0.0429622	0.666387	-0.0301669	0.658515	-0.185205	0.775428	-0.198307	0.776093	-0.202709	0.803531	-0.245074	0.816712	-0.298139	0.839921	-0.26066	0.844073	-0.398561	0.874667	-0.421847	0.879572	-0.467514	0.958503
16	63797177	64071966	Amplification	3	Deletion	1	0.102562	0.659163	0.0790743	0.686291	-0.101452	0.724823	-0.0954397	0.7486	-0.0964596	0.759136	-0.130985	0.762909	-0.116032	0.781596	-0.145766	0.784713	-0.214095	0.919241	-0.265748	0.901621	-0.311674	0.895374
18	55388458	70394892	Deletion	1	Normal	2	-0.819432	0.985135	-0.536702	0.839166	-0.277419	0.672037	-0.282246	0.677092	-0.194754	0.662029	-0.170789	0.60396	-0.138934	0.562387	-0.166735	0.556482	-0.0814153	0.541935	-0.0514867	0.537071	-0.0312494	0.536662
