# Supplementary material for: Genome-Wide Identification of Somatic Aberrations from Paired Normal-Tumor Samples
Source: PLoS One. 2014 Jan 30;9(1):e87212. doi: 10.1371/journal.pone.0087212 (PMC3907544; doi:10.1371/journal.pone.0087212)
Supplement: File S1 — contains the following files. Text S1. Detailed description of statistical methods in GIANT. Figure S1. Comparison of BAF signals in two normal replicates on different chromosomes. Figure S2. Visualized genomic aberrations for replicate pairs. Figure S3. Comparison of estimated normal cell contamination levels and tumor average copy number for simulated tumor SNP arrays. Figure S4. Comparison of specificity for identifying normal regions in simulated tumor samples. Figure S5 Sensitivities for distinguishing aberrations from normal regions by five different methods. Figure S6. Theoretical and real mean values of LRR/BAF in different scenarios. Figure S7. Aberrations in chromosome 6 of breast cancer cell line CRL-2324. Figure S8. Aberrations in chromosome 13 of breast cancer cell line CRL-2324. Figure S9. Comparison of results for breast cancer cell line CRL-2324 by different methods. Figure S10. Comparison of self-consistency for GIANT and GPHMM using dilution series data. Figure S11. Visualized results of GIANT for replicate breast cancer sample. Figure S12. Detection of germline homozygous deletion of ADAM3A gene in diluted breast tumor sample 7207. Figure S13. Comparison of the results for chromosome 8 of breast tumor 7207 by different methods. Figure S14. Significance test of genome-wide somatic amplification and LOH for urothelial cancer samples. Figure S15. Significance test of genome-wide somatic deletion for urothelial cancer samples. Figure S16. Box plots of summarized results for 112 breast cancer samples. Figure S17. Distinct patterns of genome-wide copy number profiles identified in two groups of tumors. Figure S18. Genome-wide CNA profiles of breast cancer samples. Figure S19. Frequency plot of genomic-wide CNA for 112 breast cancer samples. Figure S20. Frequency plot of genomic-wide LOH for 112 breast cancer samples. Table S1. Detailed information of hidden states in PSHMM. Table S2. Parameters estimated by GIANT on replicate SNP arrays. Table S [file pone.0087212.s001.zip › TableS6.xlsx]

## Sheet: 新建文本文档
Abberration	Chr	StartPos	StartName	EndPos	EndName	Cytoband	Num of Probes	Length	Median q-value	Min q-value
Amplification	1	120241792	rs2453040	245356037	rs11205429	1p12-1q44	4607	125114246	5.84e-21	1.6e-25
Amplification	3	162285944	rs9861850	167897890	rs1523605	3q26.1	109	5611947	0.0942	0.0722
Amplification	3	168290681	rs10936513	188130819	rs1468906	3q26.1-3q27.3	719	19840139	0.0223	0.00389
Amplification	3	189207540	rs9870112	197088537	rs12487782	3q27.3-3q29	297	7880998	0.153	0.094
Amplification	3	197444072	rs939885	199173803	rs7374500	3q29	100	1729732	0.0411	0.016
Amplification	5	111255	rs1507713	13834480	rs1910092	5p15.33-5p15.2	491	13723226	0.0942	0.0114
Amplification	5	14353033	rs30634	18275008	rs4866309	5p15.2-5p15.1	126	3921976	0.187	0.072
Amplification	5	18433222	rs2962927	32171356	rs161539	5p15.1-5p13.3	304	13738135	0.122	0.022
Amplification	5	32192845	rs4282332	32394623	rs4867433	5p13.3	6	201779	0.153	0.153
Amplification	5	35468306	rs6881409	37640662	rs1400851	5p13.2	101	2172357	0.229	0.122
Amplification	6	1395210	rs2816242	1424498	rs6905379	6p25.3	2	29289	0.229	0.229
Amplification	6	17199273	rs1408298	18432614	rs6931353	6p22.3	66	1233342	0.229	0.229
Amplification	6	20847886	rs4710942	22530322	rs9366455	6p22.3	49	1682437	0.229	0.187
Amplification	6	62307118	rs1414815	62346928	rs1336361	6q11.1	2	39811	0.122	0.122
Amplification	6	63253328	rs10454296	65293566	rs4710276	6q11.1-6q12	39	2040239	0.153	0.122
Amplification	6	107348034	rs2180138	107618045	rs7738243	6q21	9	270012	0.229	0.229
Amplification	6	128339297	rs3901020	130806857	rs7768817	6q22.33-6q23.1	89	2467561	0.0544	0.00812
Amplification	6	133736031	rs211609	133966549	rs2636596	6q23.2	13	230519	0.229	0.229
Amplification	6	134622811	rs1763505	135326841	rs9399129	6q23.2-6q23.3	21	704031	0.229	0.229
Amplification	6	135761193	rs2179781	135796164	rs737561	6q23.3	3	34972	0.153	0.153
Amplification	6	137407890	rs11154905	138060132	rs6917441	6q23.3	18	652243	0.229	0.187
Amplification	7	15817540	rs1029718	18687491	rs2286213	7p21.1	110	2869952	0.187	0.122
Amplification	7	18926752	rs4721745	23778183	rs1549394	7p21.1-7p15.3	209	4851432	0.0722	0.0544
Amplification	7	24492846	rs2529049	24668815	rs2007271	7p15.3	16	175970	0.229	0.229
Amplification	7	25688079	rs4719832	29735903	rs6958587	7p15.2-7p15.1	178	4047825	0.153	0.041
Amplification	7	31020288	rs177979	33158502	rs3884597	7p15.1-7p14.3	89	2138215	0.187	0.094
Amplification	7	33511878	rs7811261	37332078	rs1425131	7p14.3-7p14.2	150	3820201	0.187	0.153
Amplification	7	38343034	rs3807397	41087705	rs417916	7p14.1	95	2744672	0.187	0.094
Amplification	7	41683032	rs10272865	43690253	rs2232105	7p14.1-7p13	78	2007222	0.187	0.122
Amplification	7	44100295	rs10231886	44243320	rs10225003	7p13	8	143026	0.229	0.229
Amplification	7	53308455	rs1025119	55366923	rs7784706	7p12.1-7p11.2	65	2058469	0.0722	0.0544
Amplification	7	55498654	rs9656709	55925698	rs2242508	7p11.2	16	427045	0.229	0.072
Amplification	7	130357687	rs10279448	130696264	rs1643257	7q32.3	16	338578	0.229	0.229
Amplification	7	135118804	rs7781426	136943323	rs748260	7q33	60	1824520	0.187	0.187
Amplification	7	137060801	rs273954	140075539	rs964942	7q33-7q34	145	3014739	0.187	0.153
Amplification	8	35499150	rs2589756	146263538	rs6991681	8p12-8q24.3	3443	110764389	4.88e-19	3.49e-36
Amplification	10	3114516	rs4881074	4061978	rs2645220	10p15.2-10p15.1	48	947463	0.187	0.153
Amplification	10	4309640	rs1923395	5682448	rs10905869	10p15.1	58	1372809	0.133	0.041
Amplification	10	6837212	rs1837976	7732120	rs7074758	10p14	37	894909	0.229	0.229
Amplification	10	11944994	rs7069533	12486578	rs1892302	10p14-10p13	47	541585	0.153	0.122
Amplification	11	65959601	rs2279865	70919390	rs4944081	11q13.1-11q13.4	246	4959790	0.0135	2.14e-11
Amplification	11	75934863	rs3753051	75940300	rs8848	11q13.5	3	5438	0.122	0.122
Amplification	11	76098747	rs7934750	76477359	rs12286331	11q13.5	20	378613	0.153	0.153
Amplification	11	76578921	rs2276286	77080337	rs1544273	11q13.5-11q14.1	35	501417	0.229	0.229
Amplification	12	183640	rs9783494	202623	rs2289954	12p13.33	3	18984	0.229	0.229
Amplification	12	345840	rs4140962	1421785	rs7975502	12p13.33	54	1075946	0.153	0.072
Amplification	12	25252913	rs7960917	26766832	rs2291261	12p12.1-12p11.23	53	1513920	0.187	0.054
Amplification	12	27125467	rs708165	27964439	rs7309492	12p11.23-12p11.22	41	838973	0.187	0.187
Amplification	12	30322030	rs11050795	31304592	rs622946	12p11.22-12p11.21	32	982563	0.0942	0.0411
Amplification	12	31499882	rs10506073	33009511	rs7307829	12p11.21	66	1509630	0.0942	0.0544
Amplification	12	65136193	rs4913435	66291325	rs2700104	12q14.3-12q15	28	1155133	0.229	0.229
Amplification	12	67915300	rs11838112	68464641	rs1602954	12q15	25	549342	0.229	0.187
Amplification	14	21586064	rs731964	22029432	rs3751467	14q11.2	12	443369	2.65e-07	2.65e-07
Amplification	16	43423	rs2541593	34550666	rs8056602	16p13.3-16p11.1	1486	34507244	3.4e-06	9.53e-09
Amplification	17	23749871	rs2239907	25385795	rs8071742	17q11.2	83	1635925	0.0544	0.00812
Amplification	17	33664392	rs8066255	35862713	rs1009727	17q12-17q21.2	131	2198322	9.16e-05	1.27e-14
Amplification	17	35949527	rs7217770	36230524	rs1799873	17q21.2	19	280998	0.0942	0.0942
Amplification	17	36549331	rs4890158	36725455	rs12449671	17q21.2	10	176125	0.0942	0.0942
Amplification	17	44198872	rs11657371	74785180	rs897589	17q21.32-17q25.3	1381	30586309	0.000345	7.63e-11
Amplification	17	75560132	rs1696754	75734915	rs12937349	17q25.3	14	174784	0.187	0.187
Amplification	17	76861200	rs2271090	78009270	rs7218534	17q25.3	76	1148071	0.167	0.072
Amplification	17	78454495	rs2271918	78599918	rs7406119	17q25.3	20	145424	0.153	0.153
Amplification	20	73121	rs1342137	186507	rs373225	20p13	16	113387	0.229	0.229
Amplification	20	256935	rs6050227	692415	rs3746804	20p13	31	435481	0.0942	0.0942
Amplification	20	2500884	rs11908093	4930772	rs2254964	20p13	166	2429889	0.153	0.031
Amplification	20	5322358	rs8124339	5658065	rs906935	20p12.3	11	335708	0.0942	0.0942
Amplification	20	5966711	rs2235816	6048088	rs10373	20p12.3	16	81378	0.229	0.229
Amplification	20	8718282	rs6039269	14212636	rs6079381	20p12.3-20p12.1	214	5494355	0.0544	0.00563
Amplification	20	14728425	rs6079567	21523015	rs6075820	20p12.1-20p11.22	332	6794591	0.0544	0.00812
Amplification	20	22927073	rs2746618	25155931	rs8115257	20p11.21	84	2228859	0.153	0.094
Amplification	20	26170570	rs845793	32006462	rs6142058	20p11.1-20q11.22	171	5835893	0.0114	0.000803
Amplification	20	32272968	rs6119474	32462609	rs4911421	20q11.22	9	189642	0.229	0.229
Amplification	20	33517823	rs8116304	62376958	rs10485816	20q11.22-20q13.33	1508	28859136	0.000345	1.43e-10
Amplification	21	13560787	rs2742158	14626828	rs2822574	21q11.2	25	1066042	0.229	0.229
Amplification	21	37502685	rs2835669	37565455	rs1002400	21q22.13	6	62771	0.229	0.229
Amplification	21	37784243	rs4817865	37940032	rs2835859	21q22.13	8	155790	0.229	0.229
Amplification	21	39280875	rs1537106	39674877	rs2094874	21q22.2	27	394003	0.229	0.229
Amplification	21	39793680	rs9974333	39988096	rs2837121	21q22.2	10	194417	0.187	0.153
Deletion	1	763754	rs2977670	31791257	rs7545321	1p36.33-1p35.2	1584	31027504	0.0583	0.00136
Deletion	1	33715159	rs292809	33858522	rs544991	1p35.1	16	143364	0.185	0.185
Deletion	1	83667643	rs3850434	92141046	rs6604070	1p31.1-1p22.1	326	8473404	0.105	0.031
Deletion	1	93358439	rs10874763	94254590	rs492220	1p22.1	44	896152	0.185	0.185
Deletion	1	100719076	rs2030049	103034662	rs10782911	1p21.2-1p21.1	48	2315587	0.105	0.058
Deletion	1	103835683	rs4847151	109447340	rs658779	1p21.1-1p13.3	140	5611658	0.105	0.105
Deletion	3	44542069	rs6766334	46719970	rs7650366	3p21.32-3p21.31	120	2177902	0.185	0.058
Deletion	3	48439507	rs6442120	57179485	rs4455299	3p21.31-3p14.3	467	8739979	0.0306	0.00324
Deletion	3	58278163	rs1473971	60037440	rs2736767	3p14.3-3p14.2	65	1759278	0.185	0.105
Deletion	3	62335411	rs3755827	68321675	rs4446218	3p14.2-3p14.1	176	5986265	0.185	0.058
Deletion	3	71095270	rs3773494	71278468	rs9877741	3p14.1	10	183199	0.185	0.185
Deletion	4	20245528	rs2290751	30328465	rs1486786	4p15.31-4p15.1	294	10082938	0.105	0.058
Deletion	6	70891720	rs2093374	71069296	rs2242588	6q13	23	177577	0.185	0.105
Deletion	6	72182108	rs6455418	130007047	rs9372944	6q13-6q22.33	1858	57824940	0.00718	0.000192
Deletion	6	130412748	rs3890746	149761660	rs763590	6q23.1-6q25.1	684	19348913	0.0306	0.000527
Deletion	6	150274743	rs1537590	151650168	rs7738698	6q25.1	64	1375426	0.0306	0.0154
Deletion	6	152561445	rs2252748	152561445	rs2252748	6q25.1	1	1	0.185	0.185
Deletion	6	152589896	rs2635440	152634982	rs9397493	6q25.1-6q25.2	9	45087	0.185	0.185
Deletion	6	152934018	rs2623980	153137063	rs4348331	6q25.2	6	203046	0.185	0.185
Deletion	6	153550462	rs1281956	170823609	rs2021899	6q25.2-6q27	681	17273148	0.0154	0.000527
Deletion	8	185254	rs2074718	36810347	rs10089594	8p23.3-8p12	1482	36625094	2.48e-17	2.5e-20
Deletion	9	962476	rs408200	5678263	rs1360599	9p24.3-9p24.1	216	4715788	0.105	0.058
Deletion	9	9023781	rs324462	32876639	rs1888871	9p23-9p13.3	772	23852859	0.0306	5.78e-06
Deletion	9	33155985	rs10813958	33500912	rs2380772	9p13.3	25	344928	0.185	0.185
Deletion	9	33738127	rs860618	34851298	rs884634	9p13.3	62	1113172	0.105	0.105
Deletion	9	36181760	rs2025880	38747881	rs7036799	9p13.3-9p13.1	125	2566122	0.0583	0.0154
Deletion	9	79045855	rs735914	82266162	rs7048952	9q21.13-9q21.31	77	3220308	0.105	0.058
Deletion	9	95614742	rs3739752	96507729	rs7027379	9q22.32	44	892988	0.185	0.185
Deletion	9	98975037	rs10988719	104122696	rs7045622	9q22.33-9q31.1	162	5147660	0.185	0.058
Deletion	11	194062	rs2280544	1610021	rs902219	11p15.5	108	1415960	0.0306	0.0154
Deletion	11	1905537	rs2734510	3617490	rs2271589	11p15.5-11p15.4	107	1711954	0.0583	0.0306
Deletion	11	3670887	rs694102	9601973	rs7109545	11p15.4	508	5931087	0.0423	0.0154
Deletion	11	18692041	rs11024769	19238229	rs4237740	11p15.1	36	546189	0.185	0.105
Deletion	11	19958226	rs6483627	20132181	rs862785	11p15.1	22	173956	0.185	0.185
Deletion	11	22348110	rs2665677	22715744	rs7934119	11p14.3	21	367635	0.185	0.185
Deletion	11	39188220	rs10742469	43864680	rs3740983	11p12-11p11.2	99	4676461	0.185	0.185
Deletion	11	78449282	rs2016337	78835668	rs1397726	11q14.1	16	386387	0.185	0.185
Deletion	11	79542616	rs1881491	134355825	rs1965277	11q14.1-11q25	2271	54813210	1.86e-10	1.51e-12
Deletion	13	18432157	rs1867248	114108121	rs3813131	13q12.11-13q34	3093	95675965	0.000527	3.97e-07
Deletion	14	73775105	rs1860714	73778626	rs1860713	14q24.3	2	3522	0.185	0.185
Deletion	14	74200697	rs752857	75224624	rs8010560	14q24.3	61	1023928	0.185	0.185
Deletion	14	75499308	rs3917201	102682315	rs6575944	14q24.3-14q32.32	1086	27183008	0.0583	0.0154
Deletion	14	103511678	rs10147923	106357542	rs1989749	14q32.33	78	2845865	0.185	0.105
Deletion	16	34670862	rs7198892	88657637	rs2078478	16p11.1-16q24.3	1902	53986776	9.06e-16	1.01e-18
Deletion	17	66675	rs8066107	23990660	rs2302203	17p13.3-17q11.2	1367	23923986	3.89e-11	1.4e-16
Deletion	17	26186299	rs11655623	35011493	rs9889354	17q11.2-17q12	425	8825195	0.00718	0.00136
Deletion	17	35197257	rs9911634	41615467	rs2240756	17q12-17q21.31	393	6418211	0.00718	5.78e-06
Deletion	18	155503	rs948263	14966431	rs3813067	18p11.32-18p11.21	565	14810929	0.0306	0.00136
Deletion	18	18249201	rs3813129	76064957	rs4798947	18q11.2-18q23	1969	57815757	0.00718	0.000527
Deletion	19	2804566	rs10412087	3226315	rs312926	19p13.3	36	421750	0.185	0.185
Deletion	22	15447620	rs5747988	22573266	rs5760101	22q11.1-22q11.23	377	7125647	0.0583	0.0154
Deletion	22	22762601	rs2282475	49461641	rs2301584	22q11.23-22q13.33	1502	26699041	0.00136	0.000192
LOH	5	128605997	rs10055723	128867755	rs1559060	5q23.3	6	261759	0.174	0.174
LOH	8	185254	rs2074718	5281005	rs4875559	8p23.3-8p23.2	216	5095752	0.101	0.022
LOH	8	6359580	rs2979671	8165521	rs2945266	8p23.1	44	1805942	0.174	0.101
LOH	8	10873281	rs4285446	10873281	rs4285446	8p23.1	1	1	0.174	0.174
LOH	8	11633238	rs1390950	11666528	rs804269	8p23.1	10	33291	0.174	0.174
LOH	8	17576853	rs2269698	18125027	rs4986993	8p22	45	548175	0.174	0.174
LOH	8	20317569	rs962438	20637771	rs1450291	8p21.3	7	320203	0.174	0.174
LOH	8	21826742	rs3758156	22640663	rs1129474	8p21.3	89	813922	0.174	0.174
LOH	8	22936107	rs1047275	39031824	rs12548006	8p21.3-8p11.23	615	16095718	0.101	0.001
LOH	8	39188512	rs10094572	39313394	rs10958546	8p11.23	11	124883	0.174	0.174
LOH	11	87685231	rs217086	87881245	rs566277	11q14.2	8	196015	0.174	0.174
LOH	11	88729775	rs4144700	88859870	rs595518	11q14.3	7	130096	0.174	0.174
LOH	11	90618965	rs10765459	90665115	rs12365201	11q14.3	3	46151	0.174	0.174
LOH	11	96606341	rs7122523	98451612	rs5008835	11q21-11q22.1	33	1845272	0.174	0.174
LOH	11	109666585	rs1676512	110871670	rs1944114	11q22.3-11q23.1	45	1205086	0.174	0.174
LOH	11	111601856	rs2564863	111637123	rs6589271	11q23.1	4	35268	0.174	0.174
LOH	11	114084459	rs12288283	115357154	rs1030393	11q23.2	55	1272696	0.174	0.174
LOH	11	117867624	rs562780	120001874	rs4936533	11q23.3	146	2134251	0.174	0.101
LOH	11	121137676	rs7106615	125268956	rs3088241	11q24.1-11q24.2	225	4131281	0.174	0.101
LOH	13	19883448	rs9506481	20057558	rs7334222	13q12.11	11	174111	0.101	0.052
LOH	13	20316094	rs716480	20316094	rs716480	13q12.11	1	1	0.174	0.174
LOH	13	20453544	rs870846	20515552	rs7335617	13q12.11	2	62009	0.174	0.174
LOH	13	29844446	rs1275190	30284952	rs9550365	13q12.3	17	440507	0.174	0.174
LOH	13	31103642	rs1200453	33607586	rs1337052	13q13.1-13q13.2	128	2503945	0.101	0.052
LOH	13	81299893	rs1948293	81572069	rs1999384	13q31.1	4	272177	0.174	0.174
LOH	13	83510281	rs4503690	84172953	rs4884239	13q31.1	10	662673	0.174	0.174
LOH	13	87463577	rs1470245	88263127	rs1336942	13q31.2	16	799551	0.174	0.174
LOH	13	90901791	rs1535809	113325202	rs2316118	13q31.3-13q34	833	22423412	0.101	0.022
LOH	14	50440900	rs11157781	50440900	rs11157781	14q22.1	1	1	0.174	0.174
LOH	14	60859545	rs4899038	62805707	rs10145453	14q23.1-14q23.2	72	1946163	0.174	0.174
LOH	14	63614421	rs1262240	64322985	rs77806	14q23.2-14q23.3	53	708565	0.174	0.174
LOH	14	68129955	rs4899246	70753165	rs8023180	14q24.1-14q24.2	132	2623211	0.174	0.101
LOH	14	71295115	rs1204971	72685481	rs8018725	14q24.2	56	1390367	0.174	0.174
LOH	14	72894458	rs10135861	77137054	rs10873309	14q24.2-14q24.3	245	4242597	0.174	0.052
LOH	14	77676577	rs888412	77859668	rs8019860	14q24.3	9	183092	0.174	0.174
LOH	14	103716079	rs1547350	106357542	rs1989749	14q32.33	70	2641464	0.101	0.101
LOH	15	40221094	rs2280248	40270747	rs635919	15q15.1	11	49654	0.101	0.101
LOH	15	43229979	rs1706803	43280558	rs7173715	15q21.1	12	50580	0.174	0.174
LOH	15	43635213	rs8042811	43635213	rs8042811	15q21.1	1	1	0.174	0.174
LOH	15	47589563	rs1874616	48262714	rs2052759	15q21.1-15q21.2	29	673152	0.174	0.174
LOH	15	49135978	rs10851493	49470067	rs2470180	15q21.2	21	334090	0.174	0.101
LOH	15	50050557	rs1025184	50050557	rs1025184	15q21.2	1	1	0.174	0.174
LOH	15	50341036	rs4774617	50341036	rs4774617	15q21.2	1	1	0.174	0.174
LOH	15	50445543	rs13329500	54073605	rs1509408	15q21.2-15q21.3	128	3628063	0.101	0.101
LOH	15	55760738	rs4774280	65726666	rs11638739	15q21.3-15q23	468	9965929	0.101	0.052
LOH	15	66653344	rs2638049	66653562	rs4777070	15q23	2	219	0.174	0.174
LOH	15	66862528	rs2290428	67405350	rs1156855	15q23	27	542823	0.174	0.174
LOH	15	77736044	rs6495436	77736044	rs6495436	15q25.1	1	1	0.174	0.174
LOH	16	56703086	rs9937047	57932966	rs8048291	16q21	69	1229881	0.174	0.174
LOH	16	59663580	rs6500187	60137084	rs7184753	16q21	13	473505	0.174	0.174
LOH	16	60208073	rs1078754	61014001	rs1834087	16q21	18	805929	0.174	0.174
LOH	16	61524654	rs1424032	62090667	rs918703	16q21	14	566014	0.174	0.174
LOH	16	64081100	rs6499002	65144260	rs2232725	16q21	38	1063161	0.052	0.00882
LOH	16	65678216	rs7199582	88657637	rs2078478	16q22.1-16q24.3	1117	22979422	0.022	0.00309
LOH	17	66675	rs8066107	23119857	rs2297516	17p13.3-17q11.1	1328	23053183	2.39e-06	1.71e-06
LOH	17	23478534	rs1380565	23573843	rs4435306	17q11.2	5	95310	0.174	0.174
LOH	17	24016494	rs9916465	24024518	rs9904043	17q11.2	2	8025	0.174	0.174
LOH	17	24162943	rs2046759	24310977	rs1976165	17q11.2	11	148035	0.174	0.174
LOH	17	24645475	rs1850512	25055401	rs3115088	17q11.2	19	409927	0.052	0.022
LOH	17	26309550	rs1134142	26448115	rs1123232	17q11.2	5	138566	0.174	0.174
LOH	17	28214374	rs2470219	78599918	rs7406119	17q11.2-17q25.3	2505	50385545	0.000294	2.39e-06
LOH	22	38730431	rs2958650	38740585	rs7285869	22q13.1	2	10155	0.174	0.174
LOH	22	38878945	rs4402860	38878945	rs4402860	22q13.1	1	1	0.174	0.174
LOH	22	39396231	rs133064	39902464	rs12628695	22q13.2	26	506234	0.174	0.101
LOH	22	40800203	rs2269524	40977214	rs134871	22q13.2	7	177012	0.174	0.174
LOH	22	41306006	rs2239811	41336172	rs137116	22q13.2	4	30167	0.174	0.174
LOH	22	41681197	rs1569507	48599429	rs910799	22q13.2-22q13.33	360	6918233	0.174	0.101
