# Supplementary material for: Genome-Wide Identification of Somatic Aberrations from Paired Normal-Tumor Samples
Source: PLOS journal article supplement (doi:10.1371/journal.pone.0087212), 2014-01-30
Supplement: S1 (10.1371/journal.pone.0087212.s001) [file journal.pone.0087212.s001]

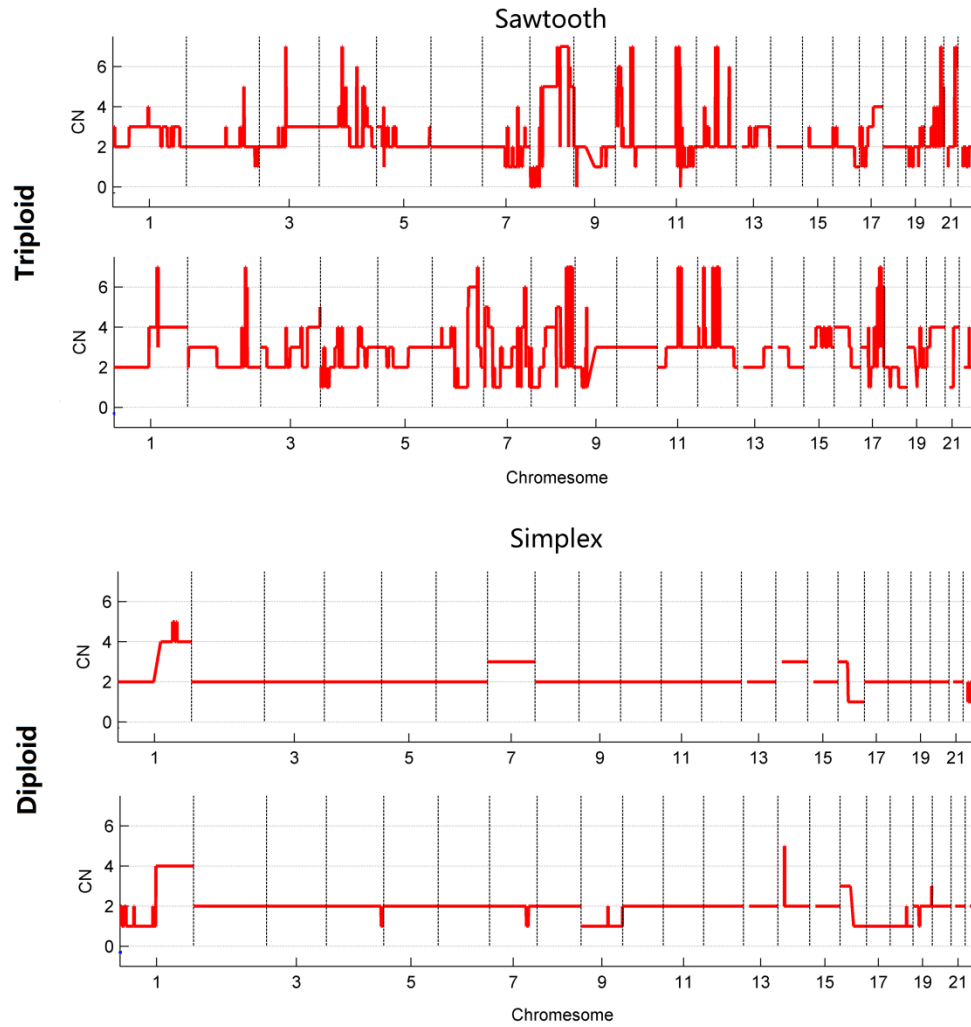

**Figure S17: Distinct patterns of genome-wide copy number profiles identified in two groups of tumors.**

This figure illustrates the ‘simplex’ pattern found in breast tumors in ‘Group I’ and the ‘sawtooth’ pattern found in breast tumors in ‘Group II’.
