# Supplementary material for: Genome-Wide Identification of Somatic Aberrations from Paired Normal-Tumor Samples
Source: PLOS journal article supplement (doi:10.1371/journal.pone.0087212), 2014-01-30
Supplement: S1 (10.1371/journal.pone.0087212.s001) [file journal.pone.0087212.s001]

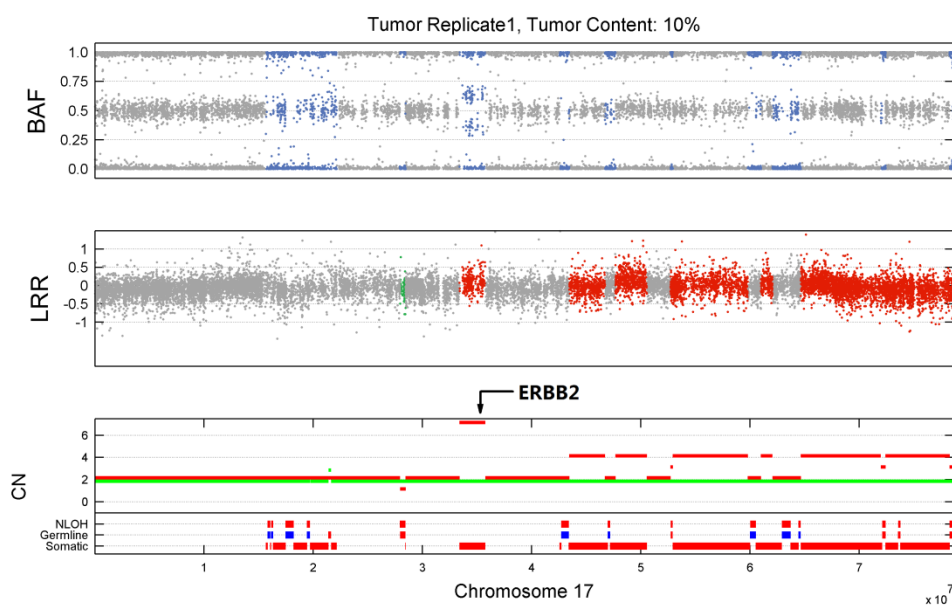

**Figure S11: Visualized results of GIANT for replicate breast cancer sample.**

This figure shows amplification of ERBB2 in chromosome 17 of breast cancer sample identified by GIANT.
