# Supplementary material for: Genome-Wide Identification of Somatic Aberrations from Paired Normal-Tumor Samples
Source: PLOS journal article supplement (doi:10.1371/journal.pone.0087212), 2014-01-30
Supplement: S1 (10.1371/journal.pone.0087212.s001) [file journal.pone.0087212.s001]

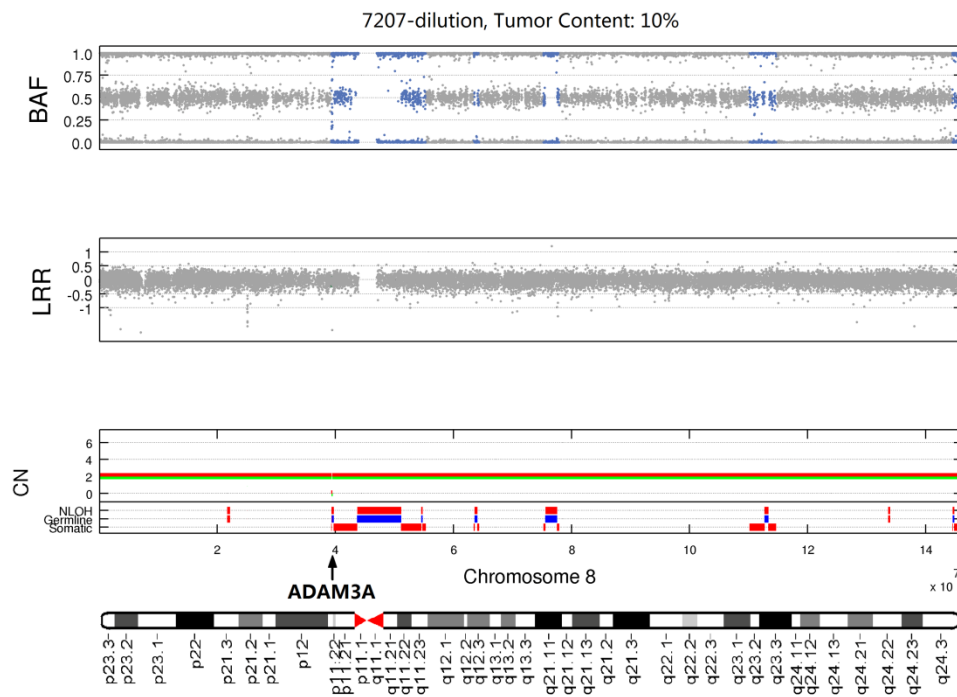

**Figure S12: Detection of germline homozygous deletion of ADAM3A gene in diluted breast tumor sample 7207.**

This figure contains visualized results of GIANT for chromosome 8, which is consistent with the results for ADAM3A in the original tumor sample.
