# Supplementary material for: Genome-Wide Identification of Somatic Aberrations from Paired Normal-Tumor Samples
Source: PLOS journal article supplement (doi:10.1371/journal.pone.0087212), 2014-01-30
Supplement: S1 (10.1371/journal.pone.0087212.s001) [file journal.pone.0087212.s001]

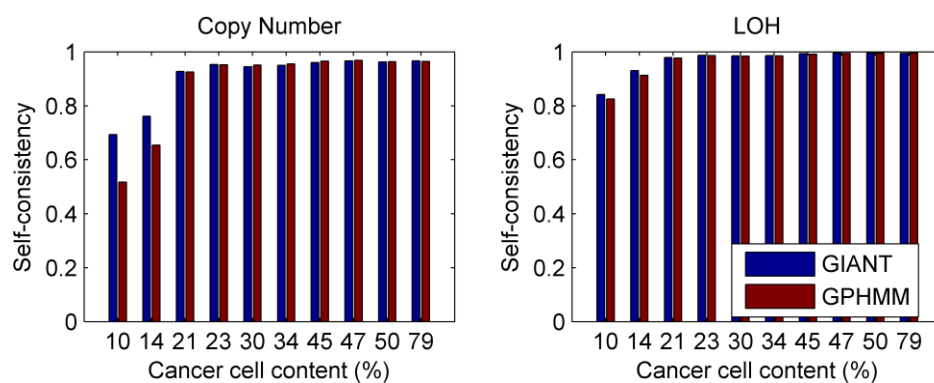

**Figure S10 - Comparison of self-consistency for GIANT and GPHMM using dilution**

**series data.** Comparisons are conducted using the dilution series of CRL-2324 and CRL-2325 after removing the chromosome 6 and 16, which contain two aberration regions in normal cell line CRL-2325. Self-consistencies are calculated for both copy number (left) and LOH (right) identification by GIANT (blue) and GPHMM (red).
