# Supplementary material for: Genome-Wide Identification of Somatic Aberrations from Paired Normal-Tumor Samples
Source: PLOS journal article supplement (doi:10.1371/journal.pone.0087212), 2014-01-30
Supplement: S1 (10.1371/journal.pone.0087212.s001) [file journal.pone.0087212.s001]

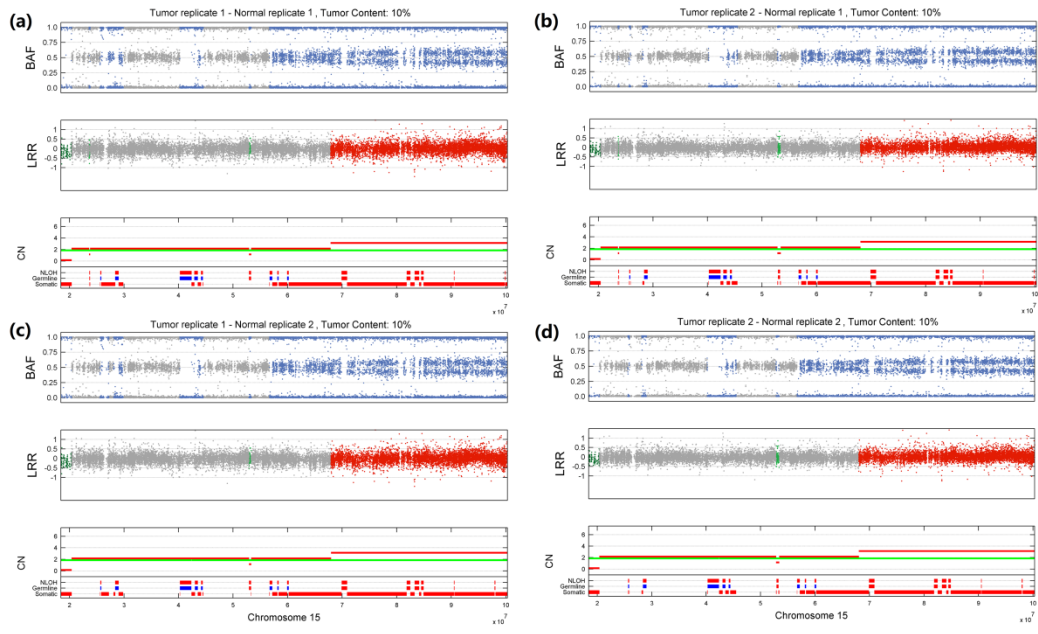

**Figure S2 - Visualized genomic aberrations for replicate pairs.** The results of GIANT for chromosome 15 in four replicate pairs are illustrated. LOH regions (colored as blue in BAF) identified by GIANT are found in all replicate pairs. Two CNA regions (colored in LRR, green denotes deletion, red denotes amplification) are also identified in all replicate pairs. The CN panel shows copy number of cancer (red) and matched normal (green) sample. Additional information, such as LOH status in normal sample, germline aberration status (blue for consistent aberration types in both normal and tumor sample, red for inconsistent aberration types) and somatic aberration status (denoting the region where aberration only occurs in tumor sample), are provided at the bottom of CN panel.
