# Supplementary material for: Genome-Wide Identification of Somatic Aberrations from Paired Normal-Tumor Samples
Source: PLOS journal article supplement (doi:10.1371/journal.pone.0087212), 2014-01-30
Supplement: S1 (10.1371/journal.pone.0087212.s001) [file journal.pone.0087212.s001]

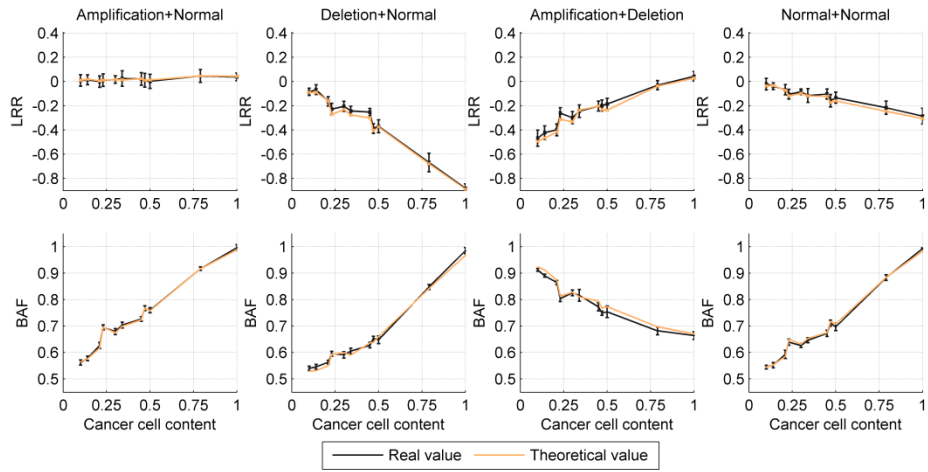

**Figure S6 - Theoretical and real mean values of LRR/BAF in different scenarios.** 12 manually annotated regions from 4 chromosomes including 6p and 16q are selected for calculating the real LRR/BAF mean values. Based on different combinations of aberration types, the results are classified into four different scenarios: amplification/deletion, amplification/normal, deletion/normal, normal/normal. Real LRR/BAF mean (black) values are illustrated by error bars. Theoretical mean values (yellow) are calculated by equation (1) and equation (3) using parameters estimated by GIANT.
