# Supplementary material for: Genome-Wide Identification of Somatic Aberrations from Paired Normal-Tumor Samples
Source: PLOS journal article supplement (doi:10.1371/journal.pone.0087212), 2014-01-30
Supplement: S1 (10.1371/journal.pone.0087212.s001) [file journal.pone.0087212.s001]

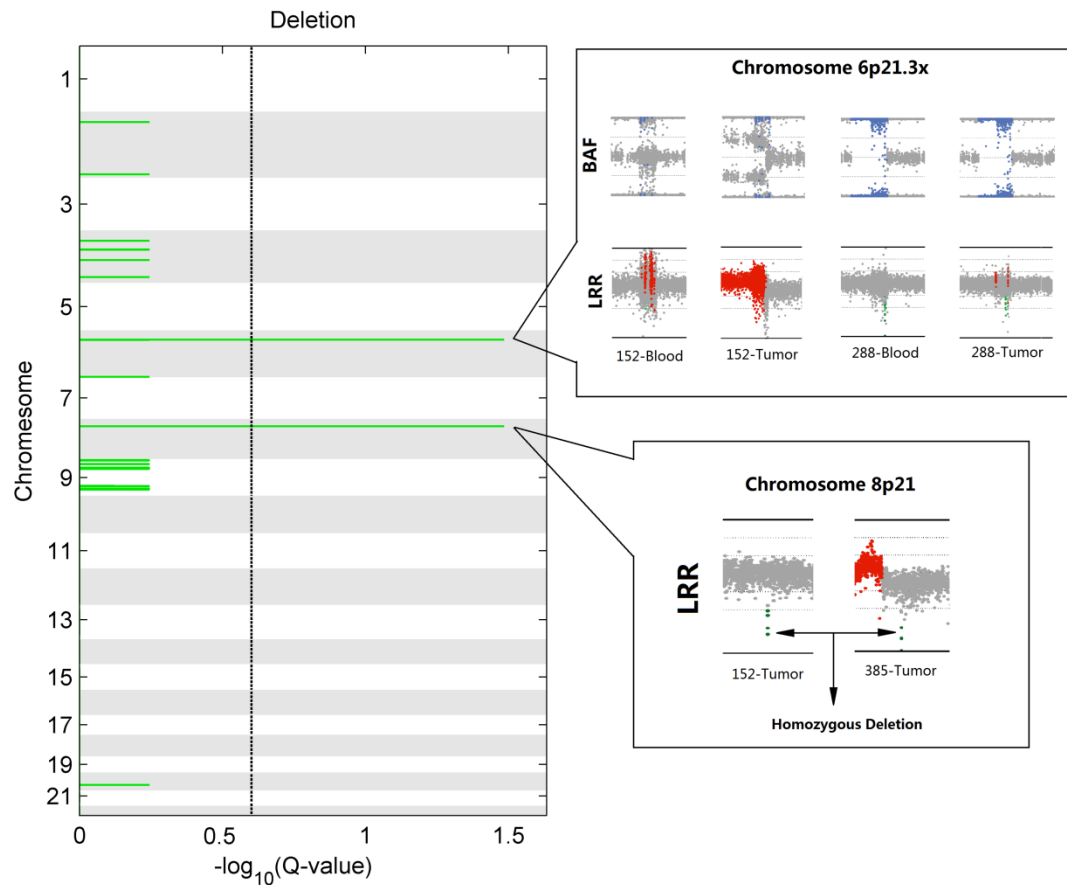

**Figure S15: Significance test of genome-wide somatic deletion for urothelial cancer samples.**

This figure illustrates (a) statistical significance of somatic deletion provided by GIANT, (b) genotyping errors found in spurious deleted region of 6p21.3, (c) homozygous deletions of tumor 152 and 385 found in significantly deleted region of 8p21.
