# Supplementary material for: Genome-Wide Identification of Somatic Aberrations from Paired Normal-Tumor Samples
Source: PLOS journal article supplement (doi:10.1371/journal.pone.0087212), 2014-01-30
Supplement: S1 (10.1371/journal.pone.0087212.s001) [file journal.pone.0087212.s001]

Table S1 Detailed information of hidden states in PSHMM

| State<br>(s) | Copy number<br>(n) | Genotype                       | $u_k$         | Description                                   |
|--------------|--------------------|--------------------------------|---------------|-----------------------------------------------|
| 1            | 0                  | N/A                            | 0.5           | Deletion of two copies                        |
| 2            | 1                  | (A,B)                          | (0,1)         | Deletion of one copy                          |
| 3            | 2                  | (AA,AB,BB)                     | (0,0.5,1)     | Normal                                        |
| 4            | 2                  | (AA,BB)                        | (0,1)         | Copy neutral with LOH                         |
| 5            | 3                  | (AAA,AAB,ABB,BBB)              | (0,1/3,2/3,1) | Three copies with duplication of one allele   |
| 6            | 3                  | (AAA,BBB)                      | (0,1)         | Three copies with LOH                         |
| 7            | 4                  | (AAAA,AAAB,ABBB,BBBB)          | (0,1/4,3/4,1) | Four copies with duplication of one allele    |
| 8            | 4                  | (AAAA,AABB,BBBB)               | (0,0.5,1)     | Four copies with duplication of both alleles  |
| 9            | 4                  | (AAAA,BBBB)                    | (0,1)         | Four copies with LOH                          |
| 10           | 5                  | (AAAAA,AAAAB,ABBBB,BBBBB)      | (0,1/5,4/5,1) | Five copies with duplication of one allele    |
| 11           | 5                  | (AAAAA,AAABB,AABBB,BBBBB)      | (0,2/5,3/5,1) | Five copies with duplication of both alleles  |
| 12           | 5                  | (AAAAA,BBBBB)                  | (0,1)         | Five copies with LOH                          |
| 13           | 6                  | (AAAAAA,AAAAB,ABBBB,BBBBB)     | (0,1/6,5/6,1) | Six copies with duplication of one alleles    |
| 14           | 6                  | (AAAAAA,AAAABB,AABBB,BBBBB)    | (0,2/6,4/6,1) | Six copies with duplication of both alleles   |
| 15           | 6                  | (AAAAAA,AAABBB,BBBBB)          | (0,0.5,1)     | Six copies with duplication of both alleles   |
| 16           | 6                  | (AAAAAA,BBBBB)                 | (0,1)         | Six copies with LOH                           |
| 17           | 7                  | (AAAAAAA,AAAAB,ABBBB,BBBBB)    | (0,1/7,6/7,1) | Seven copies with duplication of one alleles  |
| 18           | 7                  | (AAAAAAA,AAAABB,AABBB,BBBBB)   | (0,2/7,5/7,1) | Seven copies with duplication of both alleles |
| 19           | 7                  | (AAAAAAA,AAAABBB,AAABBB,BBBBB) | (0,3/7,4/7,1) | Seven copies with duplication of both alleles |
| 20           | 7                  | (AAAAAAA,BBBBB)                | (0,1)         | Seven copies with LOH                         |
