# Supplementary material for: Genome-Wide Identification of Somatic Aberrations from Paired Normal-Tumor Samples
Source: PLOS journal article supplement (doi:10.1371/journal.pone.0087212), 2014-01-30
Supplement: S1 (10.1371/journal.pone.0087212.s001) [file journal.pone.0087212.s001]

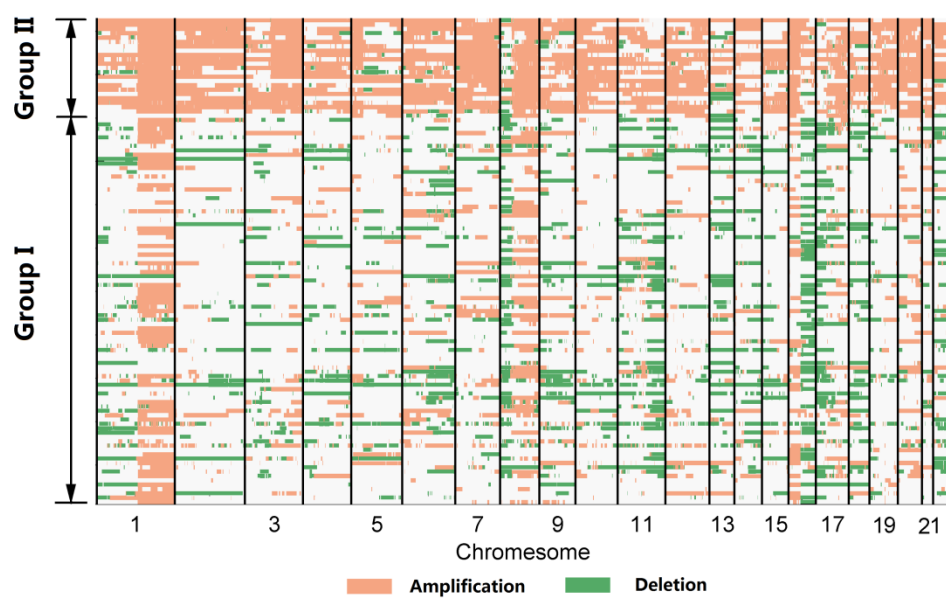

**Figure S18 - Genome-wide CNA profiles of breast cancer samples.** Genome-wide amplification (red)/deletion (green) profiles of 112 breast cancer samples categorized by estimated tumor average copy number.
