# Supplementary material for: Genome-Wide Identification of Somatic Aberrations from Paired Normal-Tumor Samples
Source: PLOS journal article supplement (doi:10.1371/journal.pone.0087212), 2014-01-30
Supplement: S1 (10.1371/journal.pone.0087212.s001) [file journal.pone.0087212.s001]

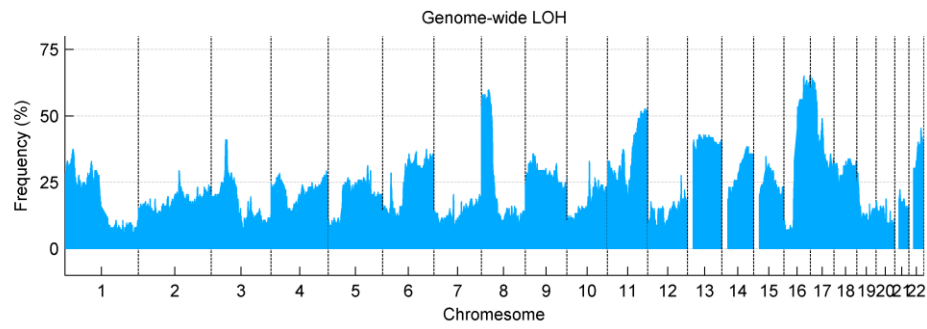

**Figure S20: Frequency plot of genomic-wide LOH for 112 breast cancer samples.**

This figure illustrates the frequencies of LOH identified by GIANT in all breast cancer samples.
