# Supplementary material for: Genome-Wide Identification of Somatic Aberrations from Paired Normal-Tumor Samples
Source: PLOS journal article supplement (doi:10.1371/journal.pone.0087212), 2014-01-30
Supplement: S1 (10.1371/journal.pone.0087212.s001) [file journal.pone.0087212.s001]

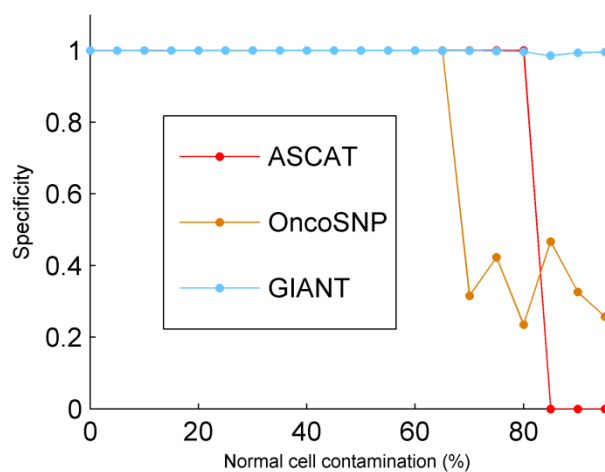

**Figure S4: Comparison of specificity for identifying normal regions in simulated tumor samples.**

Specificity is calculated by using the unaltered region in simulated tumor SNP arrays, and results are illustrated for comparing the performance in identifying non-aberration regions with respect to increasing normal cell contamination levels. Different lines correspond to the accuracies for GIANT (blue), ASCAT (red) and OncoSNP (yellow).
