# Supplementary material for: Genome-Wide Identification of Somatic Aberrations from Paired Normal-Tumor Samples
Source: PLOS journal article supplement (doi:10.1371/journal.pone.0087212), 2014-01-30
Supplement: S1 (10.1371/journal.pone.0087212.s001) [file journal.pone.0087212.s001]

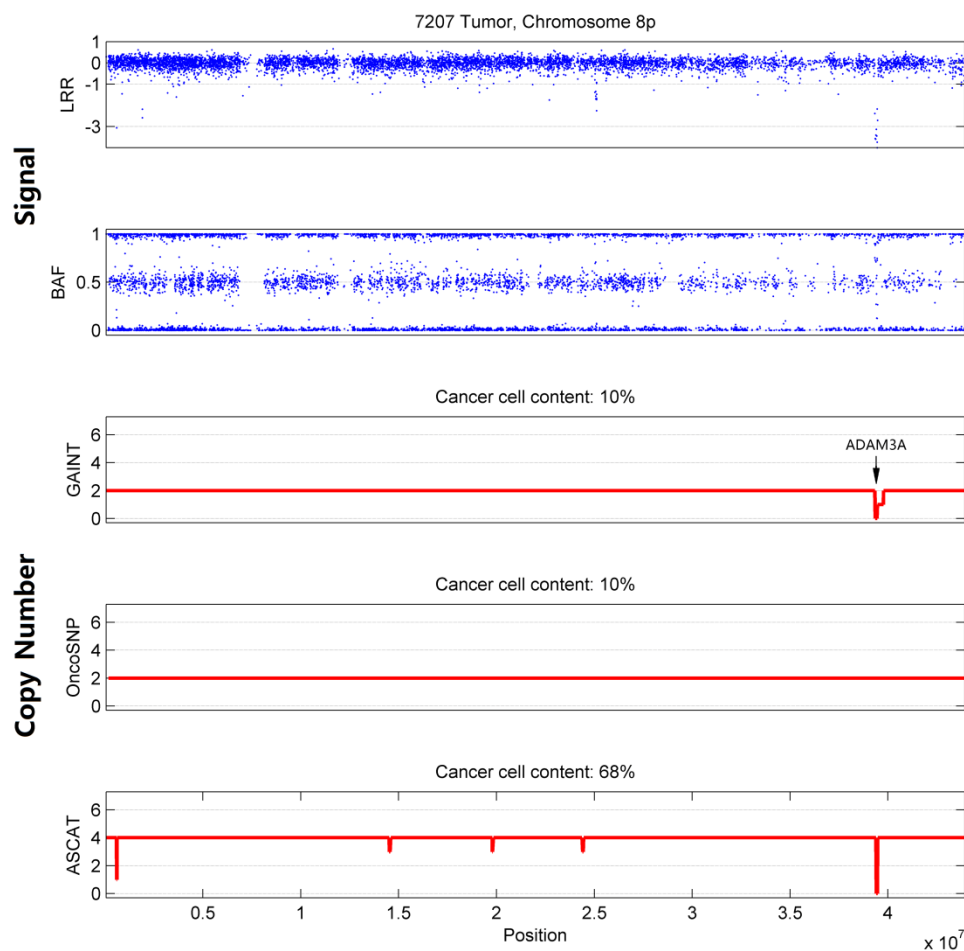

**Figure S13: Comparison of the results for chromosome 8 of breast tumor 7207 by different methods.**

This figure illustrates the results of GIANT, ASCAT and OncoSNP, including the over-all copy number of chromosome 8, cancer cell content and detection of homozygous deletion of ADAM3A gene.
