# Supplementary material for: Genome-Wide Identification of Somatic Aberrations from Paired Normal-Tumor Samples
Source: PLOS journal article supplement (doi:10.1371/journal.pone.0087212), 2014-01-30
Supplement: S1 (10.1371/journal.pone.0087212.s001) [file journal.pone.0087212.s001]

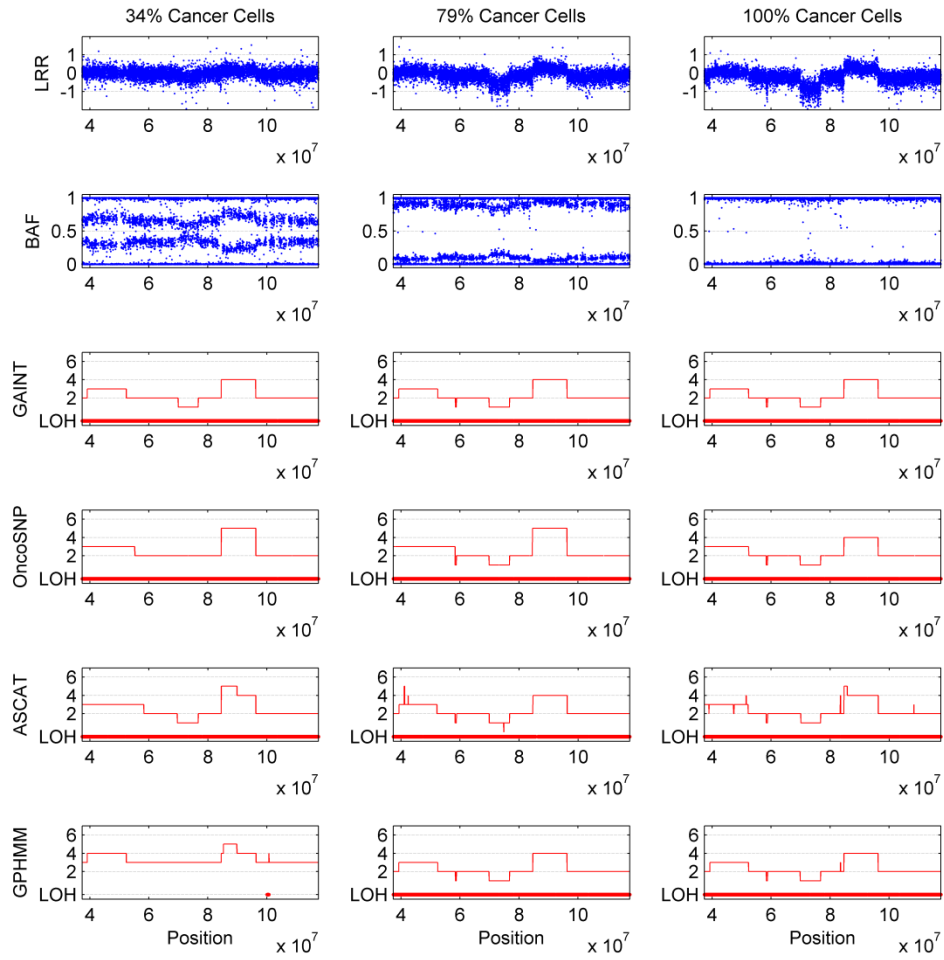

**Figure S9 - Comparison of results for breast cancer cell line CRL-2324 by different methods.**

Copy number and LOH results for chromosome arm 1p of three dilution samples with 100%, 79% and 34% cancer cells were generated by GIANT, ASCAT, OncoSNP and GPHMM.
