# Supplementary material for: Genome-Wide Identification of Somatic Aberrations from Paired Normal-Tumor Samples
Source: PLOS journal article supplement (doi:10.1371/journal.pone.0087212), 2014-01-30
Supplement: S1 (10.1371/journal.pone.0087212.s001) [file journal.pone.0087212.s001]

**Table S3 the detail of estimated parameters from paired methods**

| Real Level* (%) | GIANT1.0         |                                      |                |                |                     |                     | OncoSNP2.23      |                                      |                |                     |                     | ASCAT2.1         |                                      |
|-----------------|------------------|--------------------------------------|----------------|----------------|---------------------|---------------------|------------------|--------------------------------------|----------------|---------------------|---------------------|------------------|--------------------------------------|
|                 | ACN <sup>#</sup> | Estimated Level <sup>&amp;</sup> (%) | GC coefficient | Baseline Shift | BAF SD <sup>^</sup> | LRR SD <sup>^</sup> | ACN <sup>#</sup> | Estimated Level <sup>&amp;</sup> (%) | Baseline Shift | BAF SD <sup>^</sup> | LRR SD <sup>^</sup> | ACN <sup>#</sup> | Estimated Level <sup>&amp;</sup> (%) |
| 0               | 2.05             | 2                                    | -0.002         | -0.01          | 0.038               | 0.227               | 2.13             | 0                                    | 0.03           | 0.031               | 0.208               | 2.05             | 2                                    |
| 5               | 2.05             | 6                                    | -0.002         | -0.01          | 0.038               | 0.227               | 2.13             | 0                                    | 0.03           | 0.032               | 0.202               | 2.05             | 5                                    |
| 10              | 2.05             | 11                                   | -0.002         | -0.01          | 0.038               | 0.226               | 2.12             | 0                                    | 0.03           | 0.031               | 0.202               | 2.05             | 9                                    |
| 15              | 2.05             | 15                                   | -0.002         | -0.01          | 0.038               | 0.226               | 2.14             | 10                                   | 0.03           | 0.032               | 0.204               | 2.05             | 14                                   |
| 20              | 2.05             | 20                                   | -0.001         | -0.01          | 0.038               | 0.226               | 2.13             | 10                                   | 0.03           | 0.032               | 0.203               | 2.05             | 19                                   |
| 25              | 2.05             | 25                                   | -0.001         | -0.01          | 0.038               | 0.226               | 2.14             | 20                                   | 0.03           | 0.032               | 0.205               | 2.05             | 24                                   |
| 30              | 2.05             | 30                                   | -0.001         | -0.01          | 0.038               | 0.226               | 2.13             | 20                                   | 0.03           | 0.032               | 0.204               | 2.05             | 29                                   |
| 35              | 2.05             | 35                                   | -0.001         | -0.01          | 0.038               | 0.225               | 2.14             | 30                                   | 0.03           | 0.031               | 0.200               | 2.05             | 34                                   |
| 40              | 2.05             | 40                                   | -0.001         | -0.01          | 0.038               | 0.225               | 2.12             | 30                                   | 0.03           | 0.031               | 0.203               | 2.05             | 38                                   |
| 45              | 2.05             | 45                                   | -0.001         | -0.01          | 0.038               | 0.226               | 2.14             | 40                                   | 0.03           | 0.031               | 0.202               | 2.05             | 43                                   |
| 50              | 2.05             | 50                                   | -0.001         | -0.01          | 0.038               | 0.225               | 2.10             | 40                                   | 0.03           | 0.032               | 0.202               | 2.05             | 48                                   |
| 55              | 2.05             | 55                                   | -0.001         | -0.01          | 0.038               | 0.225               | 2.13             | 50                                   | 0.02           | 0.032               | 0.202               | 2.05             | 53                                   |
| 60              | 2.05             | 60                                   | -0.001         | -0.01          | 0.038               | 0.226               | 2.18             | 60                                   | 0.02           | 0.031               | 0.202               | 2.05             | 58                                   |
| 75              | 2.05             | 75                                   | -0.000         | -0.01          | 0.038               | 0.226               | 2.11             | 60                                   | 0.02           | 0.031               | 0.205               | 2.05             | 63                                   |
| 70              | 2.05             | 70                                   | -0.000         | -0.00          | 0.038               | 0.226               | 4.69             | 80                                   | -0.02          | 0.028               | 0.203               | 2.05             | 68                                   |
| 75              | 2.05             | 75                                   | -0.000         | -0.00          | 0.038               | 0.226               | 3.83             | 90                                   | 0.06           | 0.029               | 0.203               | 1.96             | 69                                   |
| 80              | 2.05             | 79                                   | -0.001         | -0.00          | 0.038               | 0.225               | 3.32             | 90                                   | 0.06           | 0.029               | 0.201               | 1.95             | 78                                   |
| 85              | 2.04             | 84                                   | -0.001         | -0.00          | 0.038               | 0.225               | 3.33             | 90                                   | 0.06           | 0.028               | 0.207               | N/A              | N/A                                  |
| 90              | 2.14             | 92                                   | -0.000         | -0.00          | 0.038               | 0.225               | 3.24             | 90                                   | 0.06           | 0.028               | 0.203               | N/A              | N/A                                  |
| 95              | 2.02             | 93                                   | -0.000         | 0.00           | 0.038               | 0.225               | 3.31             | 90                                   | 0.06           | 0.028               | 0.203               | N/A              | N/A                                  |

\*: Real Level = Real normal cell level; #: ACN=Average Copy Number; &: Estimated Level=Estimated normal cell level

^: SD= Standard Deviation
