# Supplementary material for: Genome-Wide Identification of Somatic Aberrations from Paired Normal-Tumor Samples
Source: PLOS journal article supplement (doi:10.1371/journal.pone.0087212), 2014-01-30
Supplement: S1 (10.1371/journal.pone.0087212.s001) [file journal.pone.0087212.s001]

**Table S5: Genomic aberrations in known abnormal regions implicated in urothelial cancer.**

This table contains a supplementary table of the detailed results of GIANT for some genomic regions implicated in urothelial cancer.

| Region  | Reported Aberration | UC152_I            |       | UC288_R            |       | UC395_I_M2         |       | UC513_M1           |       | Oncogene or suppressor gene |
|---------|---------------------|--------------------|-------|--------------------|-------|--------------------|-------|--------------------|-------|-----------------------------|
|         |                     | Somatic Aberration | Type  |                             |
| 1p36    | Amplification       | Amplification      | Broad | -                  | -     | -                  | -     | Amplification      | Focal | TP73                        |
| 4p16.3  | LOH                 | Amplification, LOH | Broad | LOH                | Broad | -                  | -     | Amplification, LOH | Broad | FGFR3                       |
| 6p22    | Amplification       | Amplification      | Focal | -                  | -     | -                  | -     | Amplification      | Broad | E2F3                        |
| 8p12-22 | Amplification       | Amplification, LOH | Focal | -                  | -     | -                  | -     | Amplification      | Broad | FGFR1, CMYC                 |
| 9p21    | Deletion LOH        | LOH                | Broad | Deletion           | Broad | -                  | -     | LOH                | Broad | CDKN2A, CDKN2B              |
| 9q32-34 | LOH                 | LOH                | Broad | LOH                | Broad | -                  | -     | LOH                | Broad | TSC1, DBCCR1                |
| 10p13   | Amplification       | Amplification      | Broad | -                  | -     | -                  | -     | Amplification      | Broad | -                           |
| 10q23   | Deletion            | LOH                | Broad | -                  | -     | -                  | -     | Amplification      | Broad | PTEN                        |
| 11q13   | Amplification       | Amplification      | Broad | -                  | -     | -                  | -     | Amplification      | Focal | CCND1, EMS1, INT2           |
| 13q14   | Deletion            | LOH                | Broad | -                  | -     | Deletion           | Focal | Amplification      | Broad | RB1                         |
| 17p13   | Deletion            | LOH                | Broad | Deletion           | Broad | -                  | -     | Amplification      | Broad | TP53                        |
| 17q21   | Amplification       | Amplification      | Broad | -                  | -     | -                  | -     | Amplification      | Broad | ERBB2                       |
| 19q13.1 | Amplification       | Amplification      | Broad | -                  | -     | -                  | -     | Amplification      | Focal | CCNE                        |
