# Supplementary material for: Genome-Wide Identification of Somatic Aberrations from Paired Normal-Tumor Samples
Source: PLOS journal article supplement (doi:10.1371/journal.pone.0087212), 2014-01-30
Supplement: S1 (10.1371/journal.pone.0087212.s001) [file journal.pone.0087212.s001]

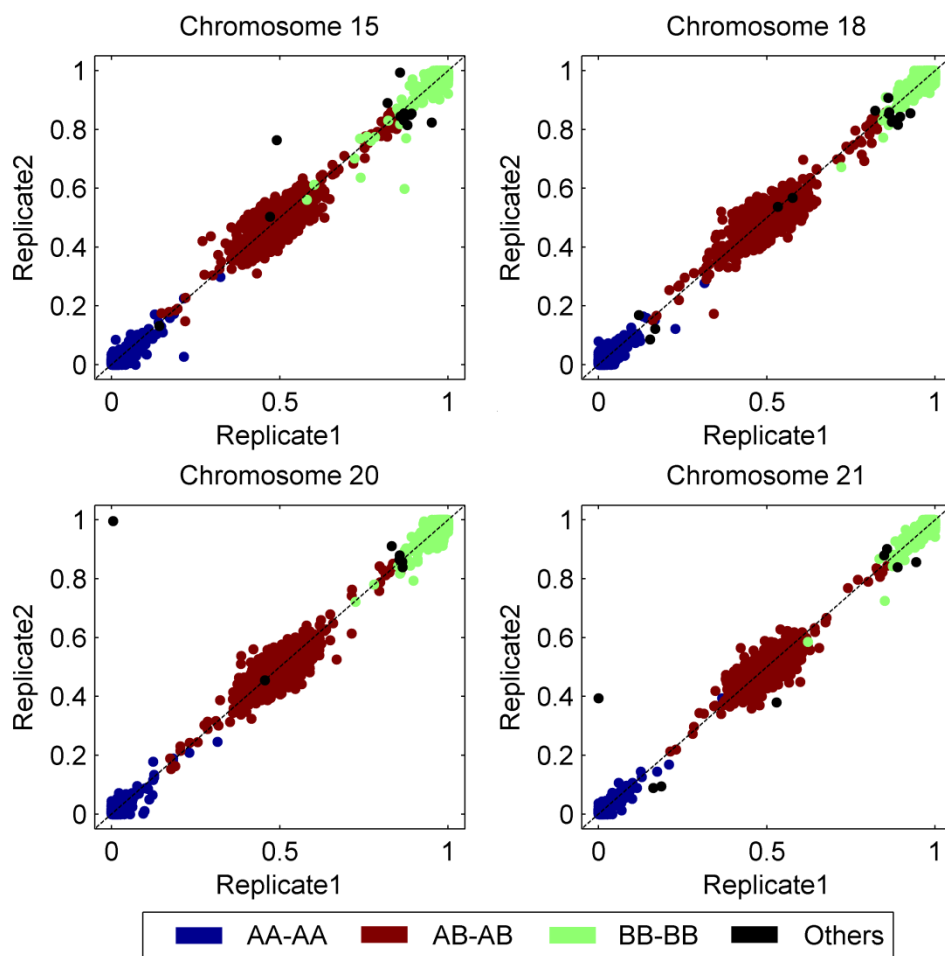

**Figure S1 - Comparison of BAF signals in two normal replicates on different chromosomes.**

Replicated normal BAF signals are illustrated by scatter plots. Genotypes are inferred by using GIANT on both two replicate data. BAF signals are colored associated with corresponding normal genotypes. Identified genotypes that are consistent in paired normal and tumor sample are marked with blue ('AA-AA'), brown ('AB-AB') and green ('BB-BB'). Other inconsistent genotypes are marked with black.
