# Supplementary material for: Genome-Wide Identification of Somatic Aberrations from Paired Normal-Tumor Samples
Source: PLOS journal article supplement (doi:10.1371/journal.pone.0087212), 2014-01-30
Supplement: S1 (10.1371/journal.pone.0087212.s001) [file journal.pone.0087212.s001]

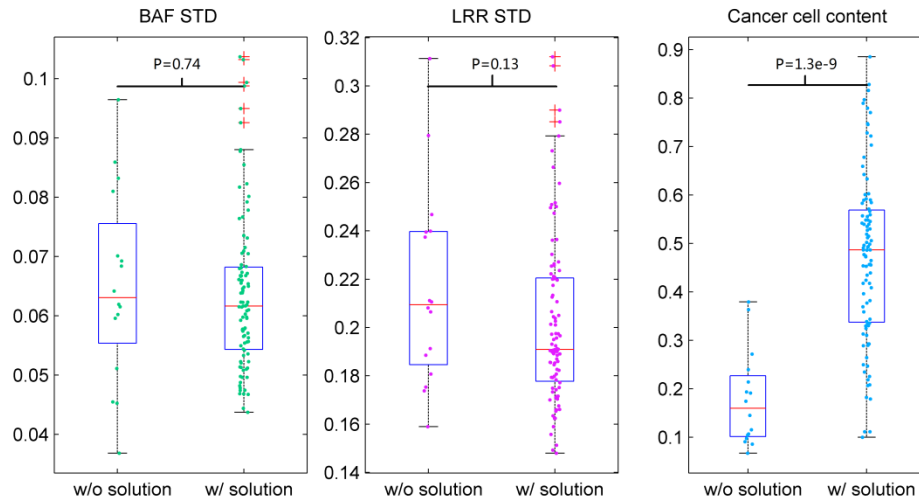

**Figure S16: Box plots of summarized results for 112 breast cancer samples.**

This figure illustrates box plots for 17 samples without feasible solution by ASCAT, as compared to box plots for the remaining tumors with feasible solution. Summarized results of standard deviation of BAF (left panel) and LRR (middle panel), cancer cell content (right panel) were accompanied with  $p$ -values of t-test.
