# Supplementary material for: Genome-Wide Identification of Somatic Aberrations from Paired Normal-Tumor Samples
Source: PLOS journal article supplement (doi:10.1371/journal.pone.0087212), 2014-01-30
Supplement: S1 (10.1371/journal.pone.0087212.s001) [file journal.pone.0087212.s001]

**Table S2 Parameters estimated by GIANT on replicate SNP arrays**

| Sample <sup>*</sup> | ACN <sup>#</sup> | Tumor <sup>&amp;</sup><br>(%) | GC<br>coefficient | Baseline<br>Shift | BAF SD <sup>^</sup> | LRR SD <sup>^</sup> |
|---------------------|------------------|-------------------------------|-------------------|-------------------|---------------------|---------------------|
| N1+T1               | 2.21             | 10.0                          | -0.08             | -0.02             | 0.04                | 0.22                |
| N1+T2               | 2.22             | 10.0                          | -0.05             | -0.01             | 0.04                | 0.19                |
| N2+T1               | 2.22             | 10.0                          | -0.08             | -0.02             | 0.04                | 0.22                |
| N2+T2               | 2.22             | 10.0                          | -0.05             | -0.01             | 0.04                | 0.19                |

<sup>\*</sup>: N1: Normal replicate 1, N2: Normal replicate 2, T1: Tumor replicate 1, T2: Tumor replicate 2; <sup>#</sup>: ACN=Average Copy Number; <sup>&</sup>: Estimated cancer cell proportion; <sup>^</sup>: SD= Standard Deviation
