# Supplementary material for: Genome-Wide Identification of Somatic Aberrations from Paired Normal-Tumor Samples
Source: PLOS journal article supplement (doi:10.1371/journal.pone.0087212), 2014-01-30
Supplement: S1 (10.1371/journal.pone.0087212.s001) [file journal.pone.0087212.s001]

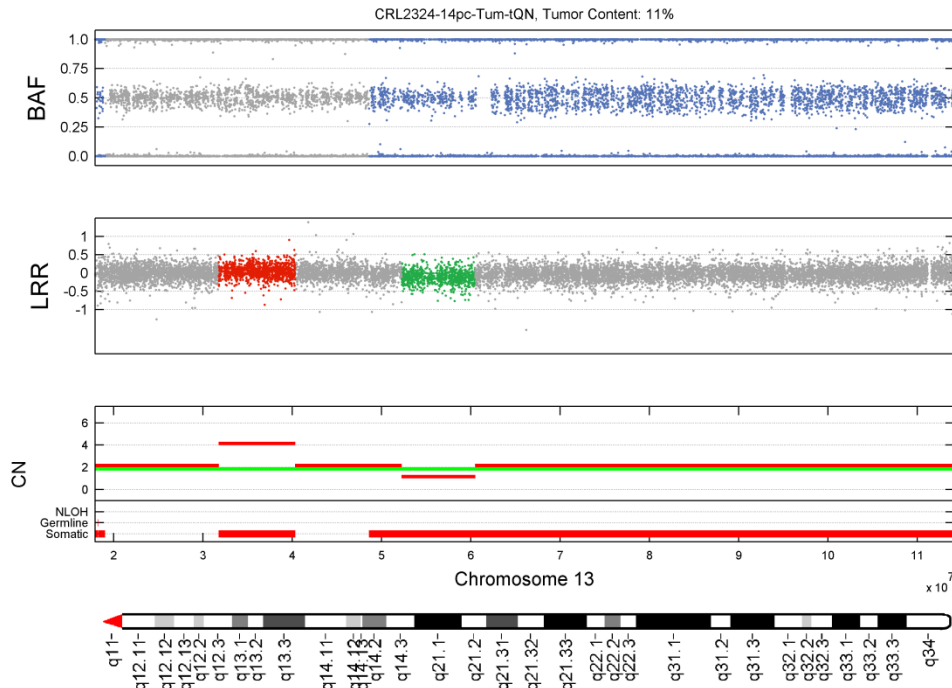

**Figure S8: Aberrations in chromosome 13 of breast cancer cell line CRL-2324.**

This figure illustrates aberrant regions identified by GIANT using dilution sample with 14% cancer cells, including known amplification on 13q13.1-mid q13, copy neutral LOH on 13q14.2-13q14 and 13q21.31-qter.
