# Supplementary material for: Genome-Wide Identification of Somatic Aberrations from Paired Normal-Tumor Samples
Source: PLOS journal article supplement (doi:10.1371/journal.pone.0087212), 2014-01-30
Supplement: S1 (10.1371/journal.pone.0087212.s001) [file journal.pone.0087212.s001]

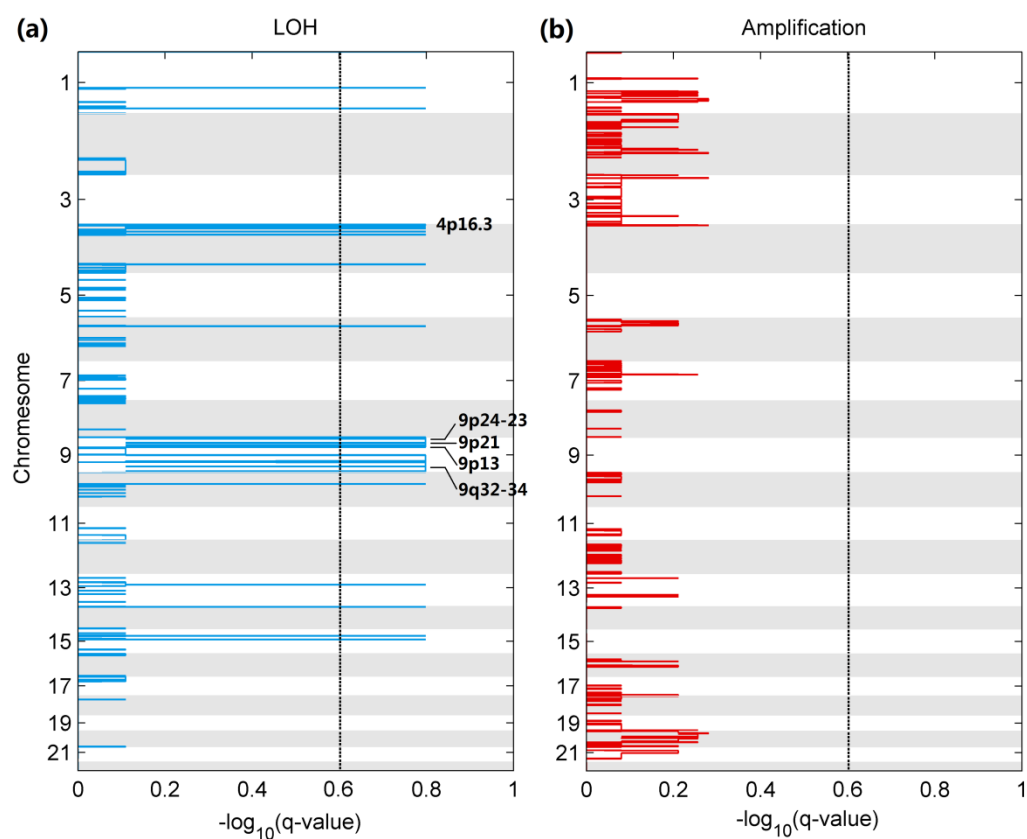

**Figure S14: Significance test of genome-wide somatic amplification and LOH for urothelial cancer samples.**

This figure illustrates statistical significance of somatic LOH (a) and amplification (b) provided by GIANT. The germline aberrations are excluded (such as LOH in chromosome 9p12-11 and 9q12 in sample UC288, as shown in Figure 7), and only somatic aberrations are reserved for further analysis. Statistical significance was evaluated by permutation test with pre-determined threshold (dashed line) for  $q$ -value.
